# Supplementary material
Source: publisher figshare collection journal article supplement (https://brill.figshare.com/articles/dataset/_/26349256)
Supplement: Supplementary file 1 [file 1]

## Sheet: Songs
Call Measures Table: It presents the measures made for all variables and all individuals analyzed in the paper. Num_id = unique number for each sample; Previous_ID = a priori identification, described in the material and methods; Genetic_ID = yes if the individual was identified by a genetic method, and no if was identified only a priori. nbn = the number of notes per call; cd = call duration in …
Num_id	Previous_ID	Genetic_ID	nbn	cd	nrr	nbp	nd	prr	op	pd	ndy	pn	pt	p80	ifr	mfr	efr	lp	fa
4.1	P.grafi	G	11	0.558	17.9211	7	0.029	206.897	13	0.005	1	6	0.278	4	3048	3083	3083	yes	yes
5.1	P.grafi	G	13	0.593	20.2361	7	0.022	272.727	12	0.003	1	7	0.275	3	2414	2954	2172	yes	yes
6	P.grafi	G	12	0.517	21.2766	9	0.027	296.296	11	0.002	1	12	0.518	10	2096	2348	2213	yes	yes
7	P.grafi	G	11	0.435	22.9885	6	0.021	238.095	10	0.003	1	2	0.062	1	2479	3460	2886	yes	yes
8	P.grafi	G	12	0.461	23.8612	9	0.022	363.636	8	0.003	0	9	0.437	2	2444	2444	2600	yes	yes
9	P.grafi	G	9	0.658	12.1581	5	0.029	137.931	10	0.004	1	5	0.33	2	2447	2539	2141	yes	yes
10	P.grafi	G	16	1.107	13.5501	7	0.027	222.222	11	0.005	1	5	0.342	1	2265	2867	2527	yes	yes
11	P.grafi	G	9	0.64	12.5	7	0.03	200	11	0.004	1	4	0.278	1	2824	3010	2739	yes	yes
12	P.grafi	G	13	0.839	14.3027	6	0.027	185.185	10	0.004	1	11	0.731	1	2689	2879	2448	yes	yes
13	P.grafi	G	14	0.689	18.8679	7	0.027	222.222	10	0.004	1	5	0.203	2	2738	3315	2655	yes	yes
14	P.grafi	G	11	0.551	18.1488	8	0.025	280	10	0.004	1	3	0.136	1	2944	3239	2895	yes	yes
15	P.grafi	G	11	0.649	15.4083	6	0.026	192.308	9	0.004	1	7	0.397	3	2576	2576	2146	yes	yes
16	P.grafi	G	7	0.405	14.8148	6	0.024	208.333	10	0.004	1	4	0.201	1	2452	2913	2469	yes	yes
17	P.grafi	G	16	0.72	20.8333	7	0.02	300	9	0.005	1	2	0.058	2	2007	2720	2181	yes	yes
18	P.grafi	G	16	0.675	22.2222	8	0.028	250	8	0.003	1	5	0.178	1	3370	3506	3217	yes	yes
19	P.grafi	G	16	0.773	19.4049	9	0.036	222.222	10	0.005	1	13	0.621	2	2760	2866	2823	yes	yes
20	P.grafi	G	10	0.452	19.9115	8	0.022	318.182	9	0.003	1	1	0.024	1	3148	3344	2787	yes	yes
21	P.grafi	G	15	0.581	24.0964	10	0.032	281.25	8	0.003	1	10	0.374	3	2588	2933	2447	yes	yes
22	P.grafi	G	16	0.671	22.3547	7	0.02	300	8	0.003	1	10	0.382	7	2838	3209	2580	yes	yes
23	P.grafi	G	12	0.45	24.4444	7	0.021	285.714	11	0.004	1	6	0.227	1	2901	3647	3183	yes	yes
24	P.grafi	G	15	0.569	24.6046	7	0.02	300	11	0.004	1	3	0.118	2	2466	2893	2213	yes	yes
26	P.perezi	G	18	0.551	30.853	5	0.018	222.222	9	0.003	1	14	0.461	8	2696	3170	3096	yes	yes
27	P.perezi	G	16	0.676	22.1893	4	0.023	130.435	10	0.005	1	9	0.366	3	1969	2345	2255	yes	yes
28	P.perezi	G	16	0.504	29.7619	5	0.017	235.294	11	0.005	0	10	0.33	3	2440	2772	2564	yes	yes
29	P.perezi	G	15	0.654	21.4067	6	0.033	151.515	13	0.004	0	14	0.644	2	2815	3515	3121	yes	yes
30	P.perezi	G	16	0.627	23.9234	7	0.027	222.222	11	0.004	1	4	0.156	1	3232	3395	3164	yes	yes
31	P.perezi	G	10	0.345	26.087	5	0.022	181.818	12	0.005	1	7	0.24	3	2628	3156	2731	yes	yes
32	P.perezi	G	19	0.639	28.169	6	0.022	227.273	9	0.003	1	13	0.441	4	2794	3321	3017	yes	yes
33	P.perezi	G	18	0.428	39.7196	4	0.013	230.769	10	0.004	1	18	0.433	5	2949	3135	2764	yes	yes
34	P.perezi	G	17	0.548	29.1971	5	0.021	190.476	9	0.003	0	6	0.204	2	2906	3187	2859	yes	yes
35	P.perezi	G	16	0.425	35.2941	4	0.019	157.895	9	0.003	0	6	0.188	1	2828	2828	2628	yes	yes
37	P.perezi	G	21	0.623	32.1027	5	0.02	200	10	0.004	1	13	0.397	5	2661	2739	2350	yes	yes
38	P.perezi	G	12	0.455	24.1758	5	0.017	235.294	10	0.004	0	9	0.33	5	2531	3118	3043	yes	yes
39	P.ridibundus	G	9	0.556	14.3885	14	0.036	361.111	5	0.002	5	5	0.27	2	2070	2428	2040	no	no
41	P.ridibundus	G	8	0.535	13.0841	13	0.036	333.333	6	0.002	3	3	0.223	3	2131	2477	1965	no	no
42	P.ridibundus	G	7	0.605	9.91736	16	0.05	300	4	0.002	6	6	0.515	5	2781	2928	2715	no	no
45	P.ridibundus	G	7	0.404	14.8515	16	0.029	517.241	4	0.002	5	1	0.017	1	2475	3064	2593	no	no
47	P.ridibundus	G	8	0.453	15.4525	22	0.049	428.571	4	0.002	10	5	0.269	2	2467	2939	2499	no	no
48	P.ridibundus	G	6	0.323	15.4799	14	0.029	448.276	4	0.002	4	5	0.27	1	1837	2100	1822	no	no
49	P.ridibundus	G	9	0.45	17.7778	15	0.035	400	5	0.002	7	4	0.209	3	2484	3080	2650	no	no
50	P.ridibundus	G	6	0.331	15.1057	17	0.037	432.432	4	0.002	6	1	0.025	1	2354	2526	2074	no	no
51	P.ridibundus	G	5	0.355	11.2676	19	0.035	514.286	4	0.001	9	1	0.03	1	2474	2797	2572	no	no
52	P.ridibundus	G	9	0.628	12.7389	17	0.039	410.256	5	0.002	7	6	0.434	1	2739	3068	2191	no	no
5	RR	NG	7	0.625	9.6	15	0.044	318.182	7	0.003	5	5	0.512	4	2429	2696	2429	no	no
8	RR	NG	7	0.803	7.47198	19	0.055	327.273	7	0.003	6	2	0.197	1	2970	3253	3253	no	no
9	RR	NG	6	0.603	8.29187	15	0.052	269.231	6	0.003	5	4	0.368	2	2443	2677	2147	no	no
10	RR	NG	5	0.629	6.3593	23	0.06	366.667	5	0.002	8	4	0.513	2	2314	2728	2428	no	no
11	RR	NG	4	0.423	7.0922	15	0.057	245.614	5	0.002	7	2	0.168	2	2104	2460	2104	no	no
13	RR	NG	6	0.883	5.66251	22	0.067	313.433	7	0.003	9	4	0.542	3	2457	2622	2325	no	no
15	PG	NG	9	0.366	21.8579	5	0.027	148.148	12	0.005	0	6	0.248	5	2809	3128	2768	yes	yes
16	RR	NG	5	0.376	10.6383	17	0.037	432.432	6	0.002	5	3	0.212	1	3382	3382	2895	no	no
17	RR	NG	8	0.671	10.4322	15	0.036	388.889	5	0.002	6	3	0.212	2	2129	2365	2055	no	no
20	RR	NG	8	0.841	8.32342	16	0.042	357.143	6	0.002	5	5	0.495	5	2293	2709	2394	no	no
22	RR	NG	5	0.584	6.84932	20	0.048	395.833	5	0.002	8	4	0.489	3	2366	2627	2627	no	no
25	PG	NG	12	0.615	17.8862	8	0.035	200	11	0.004	1	7	0.342	5	2629	2960	2781	yes	yes
27	PG	NG	10	0.615	14.6341	6	0.034	147.059	14	0.005	1	6	0.34	4	2741	3098	2641	yes	yes
28	RR	NG	6	0.517	9.67118	18	0.044	386.364	6	0.002	8	4	0.34	1	2508	2840	2524	no	no
30	RR	NG	3	0.305	6.55738	23	0.054	407.407	4	0.002	9	2	0.192	1	2456	2733	2257	no	no
31	RR	NG	5	0.57	7.01754	20	0.057	333.333	5	0.002	8	4	0.369	2	2650	2876	2391	no	no
32	RR	NG	5	0.429	9.32401	20	0.05	380	4	0.002	6	3	0.249	2	2436	2645	2452	no	no
33	RR	NG	6	0.629	7.94913	22	0.06	350	6	0.002	10	3	0.291	3	2425	2998	2681	no	no
34	RR	NG	7	0.679	8.83652	17	0.037	432.432	5	0.002	7	5	0.494	3	2192	2631	2555	no	no
36	RR	NG	8	0.642	10.9034	18	0.047	361.702	6	0.002	8	4	0.322	2	3048	3360	3063	no	no
37	RR	NG	6	0.424	11.7925	19	0.046	391.304	6	0.003	9	3	0.182	2	2483	2797	2310	no	no
38	RR	NG	7	0.444	13.5135	13	0.024	500	4	0.002	4	3	0.177	2	2502	2890	2309	no	no
39	RR	NG	5	0.328	12.1951	12	0.029	379.31	6	0.003	5	3	0.23	2	2050	2784	2241	no	no
40	RR	NG	7	0.836	7.17703	18	0.048	354.167	6	0.002	6	5	0.6	4	2892	3086	2256	no	no
41	RR	NG	7	0.84	7.14286	19	0.046	391.304	6	0.002	7	5	0.622	3	2488	2795	2020	no	no
44	RR	NG	4	0.291	10.3093	18	0.048	354.167	5	0.003	5	2	0.135	2	2159	2245	2017	no	no
45	RR	NG	8	0.639	10.9546	13	0.049	244.898	6	0.003	6	5	0.427	4	2031	2343	2031	no	no
46	RR	NG	7	0.663	9.04977	15	0.043	325.581	7	0.003	4	4	0.368	1	2750	3122	2661	no	no
48	RR	NG	6	0.451	11.0865	17	0.038	421.053	4	0.003	6	4	0.304	2	1929	2117	1755	no	no
49	PG	NG	22	0.805	26.087	5	0.022	181.818	10	0.003	0	14	0.505	6	2783	3120	2906	yes	yes
50	PG	NG	23	0.568	38.7324	5	0.022	181.818	10	0.005	0	18	0.583	13	2377	2950	2475	yes	yes
51	PG	NG	14	0.389	33.419	5	0.022	181.818	10	0.004	0	10	0.228	5	2220	2926	2044	yes	yes
52	PG	NG	13	0.403	29.7767	5	0.02	200	11	0.003	1	9	0.263	6	3050	3251	2791	yes	yes
53	PG	NG	15	0.446	31.3901	5	0.018	222.222	12	0.005	1	11	0.308	8	2852	3008	2880	yes	yes
54	PG	NG	12	0.326	33.7423	5	0.017	235.294	12	0.004	1	10	0.294	8	2794	3538	2911	yes	yes
55	PG	NG	15	0.473	29.5983	5	0.019	210.526	10	0.003	0	9	0.285	7	2865	3268	3268	yes	yes
56	PG	NG	10	0.554	16.2455	9	0.03	266.667	11	0.005	0	8	0.447	5	2249	2815	2115	yes	yes
57	RR	NG	5	0.387	10.3359	18	0.055	309.091	6	0.003	9	3	0.236	1	2580	2580	2365	no	no
58	PG	NG	15	0.404	34.6535	5	0.02	200	12	0.004	1	11	0.285	6	3136	3339	3092	yes	yes
59	RR	NG	9	0.523	15.2964	12	0.024	458.333	7	0.002	5	6	0.343	3	3005	3229	2878	no	no
61	PG	NG	14	0.337	38.5757	5	0.015	266.667	12	0.004	1	11	0.254	8	3215	3611	3374	yes	yes
63	PG	NG	15	0.368	38.0435	5	0.024	166.667	14	0.005	0	9	0.228	8	3437	3551	3144	yes	yes
64	PG	NG	16	0.398	37.6884	5	0.025	160	16	0.005	1	14	0.223	6	3142	3278	2947	yes	yes
68	PG	NG	15	0.894	15.66	7	0.038	157.895	12	0.006	1	5	0.239	5	2260	2741	2180	yes	yes
70	PG	NG	10	0.334	26.9461	5	0.024	166.667	11	0.005	1	5	0.132	4	2809	3094	2795	yes	yes
72	PG	NG	14	0.595	21.8487	7	0.024	250	11	0.004	1	10	0.424	7	2337	2831	2410	no	yes
73	PG	NG	13	0.541	22.1811	7	0.023	260.87	11	0.003	1	8	0.332	3	2918	3135	2797	yes	yes
74	PG	NG	12	0.56	19.6429	4	0.032	93.75	14	0.007	0	7	0.28	6	2473	2473	2169	yes	yes
75	PG	NG	14	0.614	21.1726	10	0.033	272.727	12	0.005	1	8	0.322	5	2554	3298	2891	yes	yes
78	PG	NG	16	0.796	18.8442	6	0.016	312.5	9	0.004	1	7	0.311	4	2541	2586	1984	yes	yes
80	PG	NG	17	0.706	22.6629	7	0.022	272.727	13	0.005	1	10	0.369	9	2565	3059	2661	yes	yes
81	PG	NG	12	0.388	28.3505	8	0.02	350	16	0.003	1	9	0.307	7	3259	3825	3376	yes	yes
82	PG	NG	13	0.497	24.1449	5	0.014	285.714	15	0.005	0	7	0.264	5	3360	3459	3295	yes	yes
83	PG	NG	15	0.667	20.9895	8	0.02	350	10	0.004	1	9	0.389	7	2342	2628	2300	yes	yes
86	PG	NG	10	0.497	18.1087	6	0.031	161.29	16	0.006	1	5	0.229	4	2580	2824	2609	yes	yes
88	PG	NG	13	0.587	20.4429	4	0.029	103.448	12	0.006	1	5	0.22	3	2503	2647	2503	yes	yes
89	PG	NG	12	0.557	19.7487	7	0.033	181.818	13	0.005	0	8	0.362	6	2741	3112	2774	yes	yes
90	PG	NG	9	0.303	26.4026	6	0.014	357.143	10	0.004	1	7	0.222	5	2423	2691	2572	no	yes
92	PG	NG	8	0.303	23.1023	7	0.032	187.5	15	0.005	2	1	0.028	1	2689	3261	2452	yes	yes
93	PG	NG	11	0.449	22.2717	5	0.016	250	9	0.003	1	8	0.316	6	2583	2865	2766	yes	yes
94	PG	NG	16	0.95	15.7895	7	0.028	214.286	18	0.004	1	9	0.499	6	2603	3137	2462	yes	yes
95	PG	NG	9	0.373	21.4477	6	0.018	277.778	11	0.004	2	2	0.042	1	2644	3966	3559	yes	yes
96	PG	NG	11	0.469	21.322	6	0.026	192.308	13	0.004	1	4	0.159	2	3169	3428	2864	yes	yes
97	PG	NG	16	0.445	33.7079	5	0.025	160	14	0.006	1	5	0.121	2	2357	2561	2373	yes	yes
98	PG	NG	22	0.702	29.9145	4	0.017	176.471	13	0.005	0	11	0.322	1	2377	2993	2797	yes	yes
99	PG	NG	14	0.462	28.1385	6	0.03	166.667	12	0.005	1	8	0.217	4	2173	2842	2662	yes	yes
100	PG	NG	17	0.586	27.3038	5	0.021	190.476	14	0.005	0	1	0.061	1	3145	3145	2951	yes	yes
101	PG	NG	17	0.487	32.8542	5	0.018	222.222	11	0.004	0	6	0.158	3	2061	3051	2611	yes	yes
102	PG	NG	15	0.421	33.2542	5	0.019	210.526	13	0.005	0	13	0.375	2	2731	3086	2666	yes	yes
103	PG	NG	19	0.577	31.1958	5	0.021	190.476	14	0.005	0	12	0.368	2	2121	3363	2939	yes	yes
104	RR	NG	5	0.354	11.2994	10	0.026	346.154	5	0.002	6	2	0.119	2	2433	2592	2258	no	no
107	PG	NG	12	0.485	22.6804	6	0.023	217.391	11	0.004	1	9	0.384	5	3056	3056	2906	yes	yes
108	PG	NG	16	0.501	29.9401	5	0.018	222.222	13	0.005	0	1	0.022	1	2411	2727	2494	no	yes
113	PG	NG	17	0.47	34.0426	5	0.017	235.294	17	0.006	0	9	0.215	5	2887	3108	2887	yes	yes
114	PG	NG	17	0.681	23.4949	4	0.018	166.667	17	0.007	0	13	0.52	9	2671	3001	2771	yes	yes
116	PG	NG	22	0.661	31.77	5	0.024	166.667	11	0.005	1	10	0.289	4	2279	2623	2379	yes	yes
117	PG	NG	15	0.575	24.3478	7	0.028	214.286	11	0.004	1	4	0.12	2	3130	3281	3039	yes	yes
118	PG	NG	10	0.431	20.8817	6	0.019	263.158	10	0.003	1	1	0.014	1	2506	3191	2856	yes	yes
119	PG	NG	19	0.547	32.9068	5	0.014	285.714	11	0.004	1	11	0.303	7	2831	3141	2661	yes	yes
120	PG	NG	12	0.452	24.3363	5	0.016	250	13	0.005	1	6	0.204	5	2781	3098	2671	yes	yes
122	PG	NG	8	0.31	22.5806	5	0.029	137.931	13	0.005	1	7	0.267	4	2827	3069	2812	yes	yes
124	PG	NG	16	0.506	29.6443	6	0.019	263.158	9	0.004	1	3	0.076	3	2534	2633	2368	yes	yes
126	PG	NG	14	0.407	31.941	4	0.015	200	10	0.004	0	12	0.347	9	2788	2900	2900	yes	yes
128	PG	NG	16	0.524	28.626	5	0.017	235.294	9	0.004	1	4	0.12	3	2476	2884	2639	yes	yes
130	PG	NG	10	0.508	17.7165	5	0.019	210.526	10	0.004	1	8	0.42	5	2409	2733	2486	yes	yes
133	PG	NG	16	0.595	25.2101	4	0.018	166.667	16	0.007	1	12	0.461	8	2724	2812	2710	yes	yes
135	RR	NG	8	0.602	11.6279	11	0.031	322.581	5	0.002	4	4	0.273	3	2125	2732	2565	no	no
136	PG	NG	12	0.428	25.7009	6	0.022	227.273	14	0.007	1	10	0.373	8	2704	2885	2557	yes	yes
138	PG	NG	16	0.499	30.0601	5	0.011	363.636	11	0.005	1	10	0.311	4	2870	3001	2899	yes	yes
139	PG	NG	14	0.576	22.5694	5	0.035	114.286	17	0.005	1	8	0.257	7	2823	3294	2712	yes	yes
140	PG	NG	16	0.551	27.2232	5	0.028	142.857	11	0.005	1	13	0.472	2	3128	3128	2542	yes	yes
141	PG	NG	12	0.432	25.463	5	0.022	181.818	16	0.008	1	9	0.273	7	2145	2540	2540	yes	yes
142	PG	NG	10	0.345	26.087	6	0.033	151.515	12	0.005	1	5	0.139	4	2677	2955	2791	yes	yes
144	PG	NG	17	0.583	27.4443	6	0.016	312.5	15	0.007	1	13	0.471	12	2745	3102	2285	yes	yes
145	PG	NG	15	0.601	23.2945	6	0.028	178.571	14	0.005	1	11	0.379	10	2671	3214	3170	yes	yes
146	PG	NG	13	0.49	24.4898	5	0.024	166.667	20	0.007	1	8	0.282	5	2593	3191	2579	yes	yes
147	PG	NG	19	0.682	26.393	5	0.022	181.818	13	0.005	0	10	0.374	4	2661	3356	3240	yes	yes
163	RR	NG	8	0.589	11.8846	15	0.034	411.765	5	0.003	5	4	0.261	2	2900	3009	2697	no	no
164	RR	NG	6	0.399	12.5313	10	0.024	375	5	0.002	4	5	0.375	1	2255	2620	2620	no	no
165	RR	NG	5	0.388	10.3093	16	0.03	500	4	0.002	8	3	0.152	2	2536	2851	2431	no	no
166	RR	NG	6	0.366	13.6612	17	0.032	500	4	0.002	6	3	0.16	3	2758	2973	2881	no	no
167	RR	NG	5	0.445	8.98876	14	0.046	282.609	7	0.003	4	3	0.255	2	2468	2715	1960	no	no
168	RR	NG	7	0.437	13.73	12	0.028	392.857	6	0.002	6	3	0.167	1	2502	2860	2264	no	no
169	RR	NG	6	0.59	8.47458	14	0.041	317.073	5	0.002	7	5	0.409	3	2156	2500	2015	no	no
170	RR	NG	8	0.62	11.2903	17	0.041	390.244	7	0.003	5	4	0.319	3	2800	3187	2429	no	no
171	RR	NG	5	0.568	7.04225	20	0.055	345.455	6	0.002	9	4	0.461	2	2319	2741	2741	no	no
172	RR	NG	7	0.519	11.5607	17	0.053	301.887	5	0.002	8	1	0.007	1	2160	2160	1504	no	no
173	RR	NG	7	0.558	10.7527	16	0.041	365.854	5	0.002	8	1	0.003	1	2498	2498	1833	no	no
174	RR	NG	5	0.351	11.396	13	0.031	387.097	4	0.002	9	2	0.108	1	2416	2493	2233	no	no
175	RR	NG	8	0.463	15.1188	12	0.024	458.333	5	0.002	6	5	0.272	4	2516	3028	2531	no	no
176	RR	NG	5	0.401	9.97506	15	0.042	333.333	5	0.002	7	3	0.205	1	2742	3001	2636	no	no
179	RR	NG	6	0.61	8.19672	22	0.046	456.522	5	0.002	13	2	0.123	1	3471	3884	3694	no	no
180	RR	NG	7	0.677	8.86263	24	0.053	433.962	5	0.002	16	4	0.363	2	2717	2840	2410	no	no
181	RR	NG	6	0.467	10.7066	18	0.05	340	5	0.002	10	3	0.22	3	2174	2485	2190	no	no
182	RR	NG	6	0.44	11.3636	12	0.033	333.333	6	0.003	6	3	0.201	2	2585	2763	2343	no	no
185	RR	NG	6	0.336	14.881	16	0.038	394.737	4	0.002	6	3	0.15	2	2680	2760	2531	no	no
186	RR	NG	7	0.452	13.2743	14	0.039	333.333	5	0.002	5	2	0.093	2	2592	2736	2528	no	no
187	RR	NG	8	0.546	12.8205	14	0.035	371.429	6	0.003	5	4	0.271	1	2213	2448	1962	no	no
188	RR	NG	9	0.46	17.3913	14	0.035	371.429	6	0.003	4	5	0.294	2	2292	2822	2230	no	no
190	RR	NG	7	0.574	10.453	15	0.041	341.463	6	0.003	6	4	0.298	4	1838	2418	2219	no	no
191	RR	NG	10	0.877	10.2623	17	0.041	390.244	5	0.003	9	5	0.406	2	1859	2637	2018	no	no
193	RR	NG	5	0.389	10.2828	18	0.042	404.762	4	0.002	7	3	0.212	3	2150	2250	1850	no	no
195	RR	NG	5	0.69	5.7971	21	0.069	289.855	9	0.004	8	3	0.359	2	2330	2932	2932	no	no
196	RR	NG	5	0.799	5.00626	19	0.055	327.273	4	0.003	9	4	0.624	3	1839	2135	1741	no	no
197	RR	NG	6	0.984	5.0813	19	0.071	253.521	8	0.003	10	4	0.63	3	2295	2627	2228	no	no
198	RR	NG	6	1.025	4.87805	20	0.071	267.606	5	0.003	11	5	0.874	4	1774	2059	1758	no	no
200	RR	NG	5	0.634	6.30915	18	0.061	278.689	6	0.003	11	3	0.347	3	1960	2434	2197	no	no
201	RR	NG	5	0.301	13.289	15	0.047	297.872	7	0.003	6	2	0.072	2	2210	2835	1924	no	no
202	RR	NG	6	0.406	12.3153	18	0.036	472.222	6	0.002	9	3	0.183	2	2655	2881	2430	no	no
203	RR	NG	7	0.459	13.0719	14	0.034	382.353	6	0.002	5	3	0.175	3	2336	2576	2416	no	no
204	RR	NG	9	0.637	12.5589	12	0.032	343.75	6	0.002	4	7	0.489	3	2717	3020	2444	no	no
205	RR	NG	5	0.289	13.8408	16	0.049	306.122	6	0.003	4	2	0.084	1	2265	2265	1774	no	no
206	RR	NG	7	0.319	18.8088	13	0.029	413.793	5	0.002	4	4	0.158	2	2606	2852	2540	no	no
208	RR	NG	6	0.286	17.4825	17	0.034	470.588	6	0.002	3	3	0.122	1	2640	2953	2578	no	no
209	RR	NG	7	0.312	19.2308	17	0.033	484.848	5	0.002	5	4	0.177	2	2666	3072	2230	no	no
210	RR	NG	11	0.661	15.1286	12	0.023	478.261	6	0.002	5	7	0.39	3	2359	2888	2661	no	no
211	RR	NG	7	0.376	15.9574	13	0.028	428.571	5	0.002	6	2	0.091	2	2194	2599	2116	no	no
212	RR	NG	6	0.343	14.5773	14	0.03	433.333	4	0.002	4	4	0.204	2	2041	2566	2566	no	no
213	RR	NG	6	0.408	12.2549	24	0.045	511.111	5	0.002	6	3	0.215	1	2868	3023	2816	no	no
214	RR	NG	5	0.269	14.8699	17	0.029	551.724	4	0.001	5	3	0.147	2	2373	2622	2406	no	no
218	RR	NG	8	0.474	14.7679	18	0.03	566.667	4	0.002	7	5	0.285	3	2429	2892	2413	no	no
219	RR	NG	6	0.385	12.987	17	0.029	551.724	4	0.002	10	3	0.165	1	2530	2863	2333	no	no
220	RR	NG	6	0.405	12.3457	15	0.028	500	5	0.002	6	3	0.18	2	2544	2764	2544	no	no
221	RR	NG	7	0.449	13.363	16	0.032	468.75	6	0.002	4	4	0.264	3	2010	2710	2710	no	no
222	RR	NG	6	0.43	11.6279	18	0.058	293.103	7	0.003	4	3	0.192	1	2472	2733	2241	no	no
225	RR	NG	5	0.221	18.0995	14	0.037	351.351	6	0.003	5	2	0.069	2	1902	2105	1668	no	no
226	RR	NG	6	0.324	15.4321	15	0.044	318.182	5	0.002	8	2	0.079	1	2686	2686	2152	no	no
228	RR	NG	5	0.233	17.1674	12	0.04	275	5	0.002	5	3	0.112	2	1782	2018	1841	no	no
229	RR	NG	5	0.267	14.9813	10	0.03	300	4	0.002	4	3	0.133	3	1950	2086	1814	no	no
230	RR	NG	7	0.361	16.6205	16	0.044	340.909	5	0.002	6	3	0.134	1	2310	2483	2238	no	no
231	RR	NG	7	0.405	14.8148	15	0.056	250	6	0.003	7	3	0.152	1	1979	2561	1962	no	no
232	RR	NG	6	0.291	17.1821	16	0.027	555.556	5	0.002	6	2	0.066	2	2500	2887	2252	no	no
233	RR	NG	8	0.475	14.7368	14	0.025	520	5	0.002	6	6	0.356	4	2696	3270	2637	no	no
234	RR	NG	5	0.281	14.2349	19	0.036	500	5	0.002	11	2	0.082	1	2632	2882	2514	no	no
235	RR	NG	6	0.31	16.129	26	0.051	490.196	4	0.001	12	3	0.148	1	2276	2610	2209	no	no
236	RR	NG	5	0.268	14.9254	13	0.027	444.444	4	0.002	4	4	0.191	2	1728	1952	1744	no	no
1	LE	G	23	1.02	21.5686	7	0.02	300	8	0.004	1	20	0.89	14	1756	2782	2365	yes	yes
2	LE	G	17	0.82	19.5122	7	0.021	285.714	8	0.004	1	10	0.462	9	1958	2666	2231	yes	yes
237	LE	NG	12	0.636	17.2956	6	0.019	263.158	12	0.006	1	5	0.224	4	2040	2344	2111	yes	yes
238	LE	NG	20	0.817	23.2558	5	0.022	181.818	17	0.005	2	12	0.491	11	2839	3053	2732	yes	yes
239	LE	NG	31	1.297	23.1303	5	0.017	235.294	14	0.005	2	20	0.847	18	2153	2542	1930	yes	yes
240	LE	NG	20	0.866	21.94	6	0.027	185.185	18	0.006	2	12	0.485	11	2758	3034	3034	yes	yes
241	LE	NG	21	1.423	14.0548	6	0.037	135.135	14	0.006	1	20	1.563	10	1926	2358	2162	yes	yes
242	LE	NG	24	1.823	12.6166	6	0.022	227.273	12	0.006	1	12	0.89	8	1898	2599	1990	yes	yes
243	LE	NG	17	0.801	19.975	4	0.021	142.857	12	0.006	0	13	0.609	10	2043	2277	2744	yes	yes
244	LE	NG	23	1.014	21.6963	5	0.028	142.857	13	0.005	1	15	0.648	11	2211	3038	2501	yes	yes
245	LE	NG	13	0.663	18.0995	6	0.03	166.667	21	0.008	2	8	0.739	4	2437	2966	2260	yes	yes
247	LE	NG	22	1.011	20.7715	5	0.021	190.476	11	0.005	1	17	0.783	15	2700	3000	2560	yes	yes
248	LE	NG	14	0.654	19.8777	6	0.022	227.273	11	0.005	1	12	0.533	11	2218	2890	2218	yes	yes
249	LE	NG	18	0.717	23.7099	5	0.025	160	12	0.006	1	13	0.561	10	2208	2895	2097	yes	yes
250	LE	NG	16	0.793	18.9155	5	0.027	148.148	14	0.006	2	13	0.609	10	2009	2653	2517	yes	yes
251	LE	NG	15	0.896	15.625	5	0.018	222.222	14	0.006	1	10	0.521	7	2373	2741	2434	yes	yes
252	LE	NG	29	1.298	21.5716	5	0.019	210.526	15	0.008	1	11	0.506	6	2024	2880	2257	yes	yes
253	LE	NG	17	0.903	17.7187	4	0.014	214.286	13	0.006	2	16	0.838	9	1867	2599	2343	yes	yes
254	LE	NG	27	1.126	23.0906	5	0.02	200	12	0.005	1	20	1.082	12	2112	2645	2368	yes	yes
255	LE	NG	18	1.025	16.5854	6	0.032	156.25	18	0.008	2	16	1.041	13	1294	2357	2299	yes	yes
256	LE	NG	19	1.309	13.751	5	0.024	166.667	13	0.007	1	12	0.833	12	2127	2600	2272	yes	yes
257	LE	NG	18	1.155	14.7186	6	0.032	156.25	15	0.01	1	16	1.028	12	1708	2213	2077	yes	yes
258	LE	NG	18	1.054	16.129	4	0.023	130.435	12	0.006	1	11	0.637	6	2044	2673	2240	yes	yes
259	LE	NG	16	0.932	16.0944	6	0.027	185.185	16	0.006	1	12	0.666	5	2104	2597	2218	yes	yes
260	LE	NG	19	1.123	16.0285	5	0.023	173.913	14	0.005	1	10	0.604	11	2044	2866	2311	yes	yes
261	LE	NG	30	1.393	20.8184	6	0.021	238.095	15	0.006	1	20	0.989	12	2246	3070	2828	yes	yes
262	LE	NG	17	0.84	19.0476	6	0.024	208.333	14	0.005	2	11	0.556	5	2128	3051	2199	yes	yes
263	LE	NG	19	0.816	22.0588	5	0.026	153.846	15	0.006	1	15	0.656	10	1910	2552	2552	yes	yes
264	LE	NG	18	0.69	24.6377	4	0.019	157.895	13	0.006	1	13	0.453	11	2215	2948	2374	yes	yes
265	LE	NG	19	1.252	14.377	6	0.035	142.857	12	0.006	1	16	1.009	11	1810	2243	2150	yes	yes
266	LE	NG	13	0.633	18.9573	5	0.024	166.667	12	0.005	1	6	0.315	5	1765	2331	2137	yes	yes
267	LE	NG	21	0.996	20.0803	5	0.021	190.476	10	0.005	1	13	0.619	12	1666	2500	2500	yes	yes
268	LE	NG	19	0.758	23.7467	5	0.017	235.294	13	0.006	2	18	0.739	12	2015	2526	2396	yes	yes
270	LE	NG	14	0.654	19.8777	5	0.021	190.476	11	0.005	2	12	0.56	7	2135	2491	2355	yes	yes
271	LE	NG	21	1.04	19.2308	4	0.023	130.435	14	0.005	1	17	0.825	9	2513	3120	2528	yes	yes
272	LE	NG	17	0.825	19.3939	5	0.02	200	12	0.005	1	12	0.56	10	2004	2385	2368	yes	yes
273	LE	NG	23	0.943	23.3298	4	0.016	187.5	15	0.006	2	15	0.561	14	2281	2696	2289	yes	yes
274	LE	NG	23	0.956	23.0126	4	0.017	176.471	15	0.007	1	20	0.807	20	2345	2569	2103	yes	yes
275	LE	NG	23	1.558	14.1207	5	0.03	133.333	13	0.007	1	14	0.902	8	1702	2314	2082	yes	yes
276	LE	NG	20	1.753	10.8386	6	0.043	116.279	11	0.008	2	17	1.504	10	1763	2708	2267	yes	yes
277	LE	NG	20	1.668	11.3909	6	0.034	147.059	17	0.011	2	14	1.143	14	2052	2501	2196	yes	yes
278	LE	NG	18	1.452	11.708	4	0.037	81.0811	11	0.006	1	8	0.59	5	2000	2280	2049	yes	yes
279	LE	NG	26	1.082	23.1054	5	0.032	125	14	0.006	2	20	0.825	11	2114	2600	2007	yes	yes
280	LE	NG	21	0.995	20.1005	6	0.035	142.857	15	0.006	2	11	0.489	7	2205	2941	2426	yes	yes
281	LE	NG	28	1.411	19.1354	5	0.037	108.108	13	0.006	1	17	0.875	13	2337	3078	2569	yes	yes
282	LE	NG	18	0.761	22.339	5	0.022	181.818	10	0.005	1	16	0.666	11	1731	2329	2329	yes	yes
285	LE	NG	20	0.974	19.5072	6	0.024	208.333	11	0.006	1	17	0.849	14	1478	2240	1859	yes	yes
286	LE	NG	25	1.346	17.8306	6	0.03	166.667	10	0.005	1	23	1.257	14	1798	2429	2130	yes	yes
287	LE	NG	27	1.324	19.6375	6	0.032	156.25	13	0.005	1	20	0.972	17	2000	2788	2239	yes	yes
288	LE	NG	16	0.64	23.4375	5	0.016	250	10	0.005	1	11	0.393	7	1928	2571	2342	yes	yes
289	LE	NG	17	0.954	16.7715	7	0.029	206.897	13	0.004	1	15	0.792	6	2431	2701	2311	yes	yes
290	LE	NG	26	0.731	34.1997	4	0.015	200	12	0.005	1	22	0.641	14	1965	2661	2661	yes	yes
291	LE	NG	31	0.897	33.4448	5	0.022	181.818	12	0.005	1	22	0.969	11	2326	2971	2671	yes	yes
292	LE	NG	19	0.802	22.4439	6	0.018	277.778	9	0.004	3	13	0.539	13	1795	2241	2018	yes	yes
293	LE	NG	22	0.736	28.5326	5	0.027	148.148	9	0.003	1	17	0.667	10	1820	2121	1777	yes	yes
294	LE	NG	30	1.528	18.9791	4	0.029	103.448	11	0.004	1	28	1.485	16	2303	3209	2595	yes	yes
295	LE	NG	28	0.948	28.481	6	0.03	166.667	12	0.006	2	25	0.876	16	1813	2283	2283	yes	yes
299	LE	NG	27	1.208	21.5232	4	0.032	93.75	10	0.006	1	20	1.169	17	1910	2341	2096	yes	yes
300	LE	NG	24	0.897	25.641	6	0.03	166.667	11	0.006	2	21	0.88	16	2263	2860	2860	yes	yes
303	LE	NG	26	1.174	21.2947	6	0.03	166.667	13	0.006	2	20	0.92	17	1974	2332	2332	yes	yes
304	LE	NG	17	0.907	17.6406	5	0.03	133.333	11	0.006	1	14	0.778	8	1437	2074	2074	yes	yes
305	LE	NG	14	0.716	18.1564	5	0.025	160	12	0.005	1	8	0.366	4	2562	2860	2534	yes	yes
307	LE	NG	16	0.794	18.8917	5	0.023	173.913	15	0.006	1	11	0.569	6	2837	2837	2467	yes	yes
308	LE	NG	18	0.893	19.037	4	0.024	125	13	0.005	1	14	0.693	3	3022	3263	3052	yes	yes
309	LE	NG	17	0.901	17.758	7	0.026	230.769	11	0.004	1	12	0.556	9	3011	3075	2693	yes	yes
312	LE	NG	25	1.265	18.9723	4	0.027	111.111	16	0.005	1	20	0.858	12	2491	3049	2278	yes	yes
320	LE	NG	18	0.92	18.4783	4	0.024	125	15	0.006	1	12	0.705	9	2058	2573	2573	yes	yes
321	LE	NG	14	0.53	24.5283	4	0.02	150	15	0.007	1	9	0.313	6	2358	2651	2358	yes	yes
322	LE	NG	18	0.704	24.1477	6	0.027	185.185	12	0.005	1	13	0.403	12	2785	3299	2754	yes	yes
323	LE	NG	22	1.012	20.751	4	0.03	100	12	0.006	1	13	0.548	10	2173	2550	2304	yes	yes
324	LE	NG	21	0.893	22.3964	5	0.03	133.333	11	0.005	1	13	0.565	8	2052	2292	2022	yes	yes
326	LE	NG	23	0.887	24.8027	6	0.031	161.29	15	0.005	1	19	0.747	8	2741	3219	2900	yes	yes
327	LE	NG	16	0.871	17.2216	4	0.017	176.471	13	0.005	1	9	0.503	5	2583	3005	2833	yes	yes
328	LE	NG	16	0.854	17.5644	4	0.022	136.364	11	0.006	1	15	0.778	13	1785	2497	2497	yes	yes
329	LE	NG	28	1.517	17.7983	4	0.02	150	13	0.006	1	22	1.204	19	2081	2438	2304	yes	yes
330	LE	NG	29	1.613	17.359	5	0.027	148.148	15	0.006	1	22	1.084	22	2483	3063	2661	yes	yes
331	LE	NG	27	1.326	19.6078	5	0.024	166.667	18	0.007	1	22	1.075	16	2407	2911	2580	yes	yes
332	LE	NG	23	1.313	16.7555	4	0.02	150	14	0.006	1	15	0.912	11	2444	3015	2539	yes	yes
333	LE	NG	18	0.963	17.6532	5	0.035	114.286	15	0.007	1	15	0.794	11	2138	2392	2138	yes	yes
334	LE	NG	21	1.106	18.0832	5	0.019	210.526	12	0.007	2	18	0.888	11	2190	2676	2676	yes	yes
335	LE	NG	31	1.785	16.8067	5	0.023	173.913	13	0.005	1	20	1.097	18	2627	3208	2671	yes	yes
336	LE	NG	14	0.568	22.8873	5	0.025	160	14	0.004	2	10	0.374	8	2959	3568	3241	yes	yes
337	LE	NG	17	0.698	22.9226	6	0.024	208.333	13	0.003	1	10	0.389	10	2929	3420	3018	yes	yes
340	LE	NG	25	1.488	16.129	4	0.023	130.435	15	0.005	1	14	0.838	6	2391	3174	3020	yes	yes
341	LE	NG	29	1.193	23.4702	4	0.017	176.471	12	0.005	1	26	1.059	20	2171	2586	2586	yes	yes
343	LE	NG	19	0.973	18.4995	4	0.025	120	13	0.006	0	16	0.81	11	2366	2717	2549	yes	yes
344	LE	NG	18	0.743	22.8802	6	0.018	277.778	11	0.005	2	6	0.25	6	1891	2627	2410	yes	yes
347	LE	NG	29	1.172	23.8908	5	0.019	210.526	12	0.004	1	18	0.631	11	2370	3321	3321	yes	yes
349	LE	NG	33	1.697	18.8568	5	0.026	153.846	13	0.006	0	27	1.222	14	1743	2283	2094	yes	yes
351	LE	NG	20	0.935	20.3209	8	0.026	269.231	16	0.006	1	18	0.846	8	1828	2593	2390	yes	yes
352	LE	NG	19	0.797	22.5847	8	0.038	184.211	19	0.007	2	16	0.645	12	1900	2681	2180	yes	yes
353	LE	NG	20	0.872	21.789	4	0.024	125	10	0.004	0	16	0.724	16	2281	2888	2512	yes	yes
354	LE	NG	27	1.314	19.7869	8	0.035	200	16	0.006	1	18	0.817	15	2142	3031	2492	yes	yes
355	LE	NG	30	1.05	27.619	8	0.023	304.348	9	0.006	2	28	0.95	23	1916	2379	2379	yes	yes
356	LE	NG	27	1.129	23.0292	6	0.027	185.185	18	0.007	1	22	0.899	16	2262	3066	2643	yes	yes
357	LE	NG	30	1.349	21.4974	5	0.033	121.212	15	0.008	1	21	0.938	14	1544	2617	2617	yes	yes
358	LE	NG	33	1.644	19.4647	6	0.045	111.111	16	0.006	1	19	0.893	17	2327	2784	2313	yes	yes
359	LE	NG	18	0.958	17.7453	6	0.03	166.667	19	0.008	1	10	0.465	8	2039	2798	2466	yes	yes
361	LE	NG	20	1.086	17.4954	4	0.03	100	12	0.007	0	16	0.836	10	1808	2285	2285	yes	yes
362	LE	NG	22	1.213	17.3124	4	0.024	125	13	0.006	0	16	0.848	15	1873	2241	2057	yes	yes
363	RR	NG	8	0.553	12.6582	11	0.029	344.828	8	0.003	2	5	0.313	2	2805	2855	2037	no	no
